# Supplementary material for: Stathmin regulates mutant p53 stability and transcriptional activity in ovarian cancer
Source: PubMed Central journal article supplement (PMC3662314; doi:10.1002/emmm.201201504), 2013-04-22

Figure 1

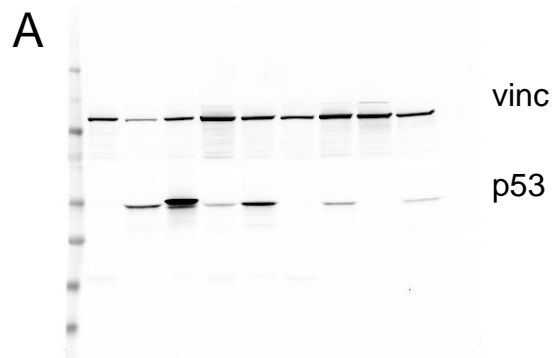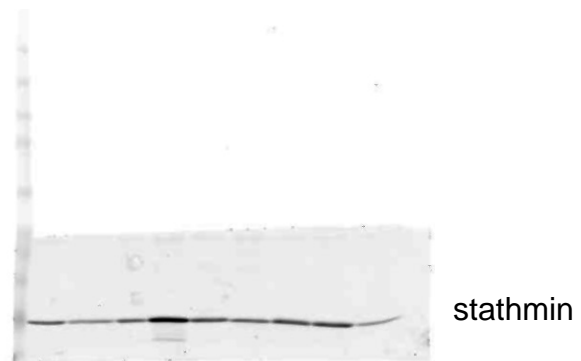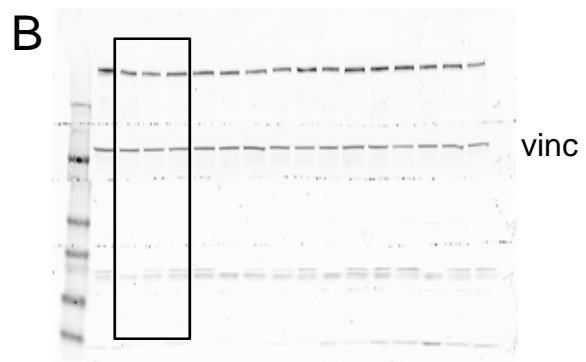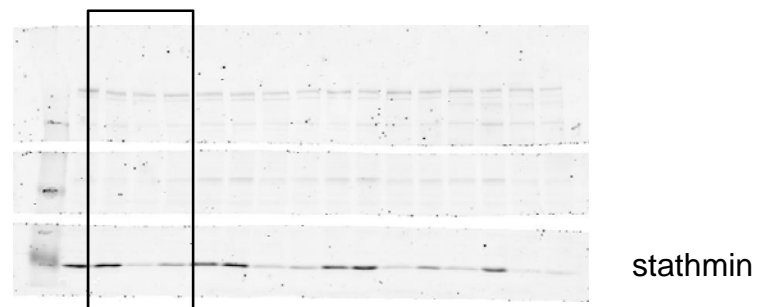

Figure 1

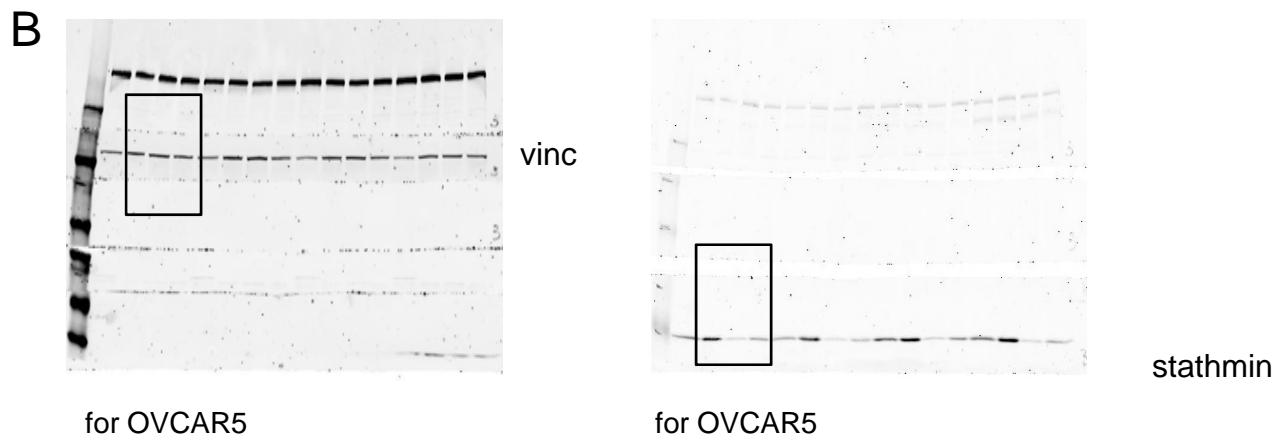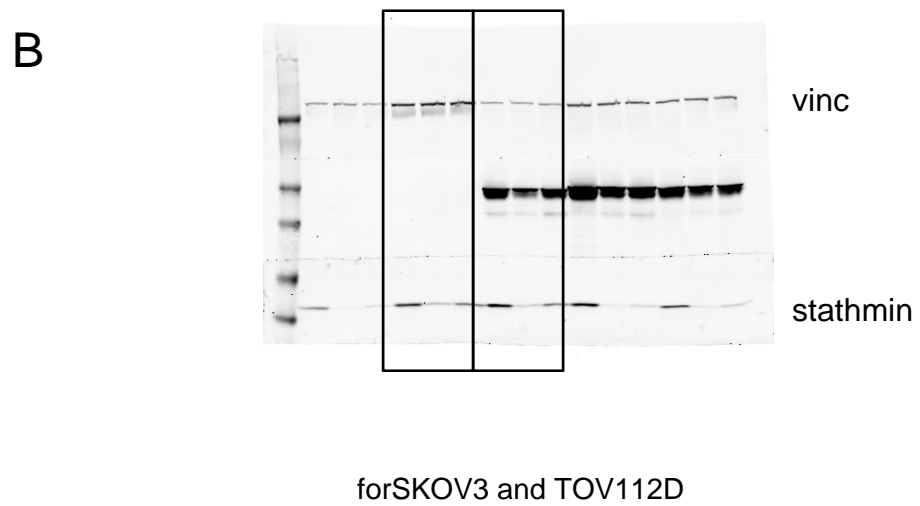

Supplement: emmm0005-0707-sd2.pdf [file emmm0005-0707-sd2.pdf]
