# Supplementary material for: Stathmin regulates mutant p53 stability and transcriptional activity in ovarian cancer
Source: PubMed Central journal article supplement (PMC3662314; doi:10.1002/emmm.201201504), 2013-04-22

Figure 2

A

for MDAH

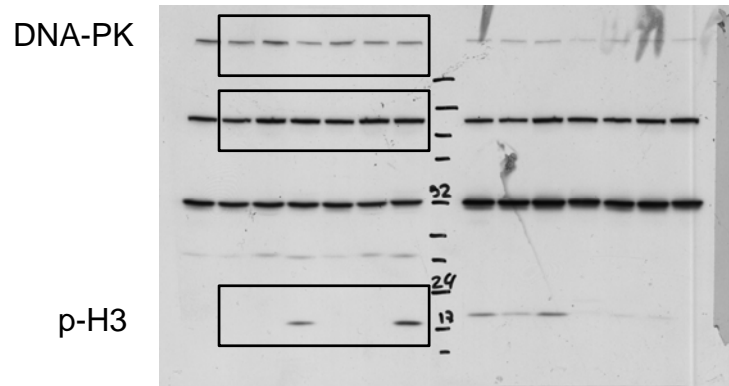

vinc

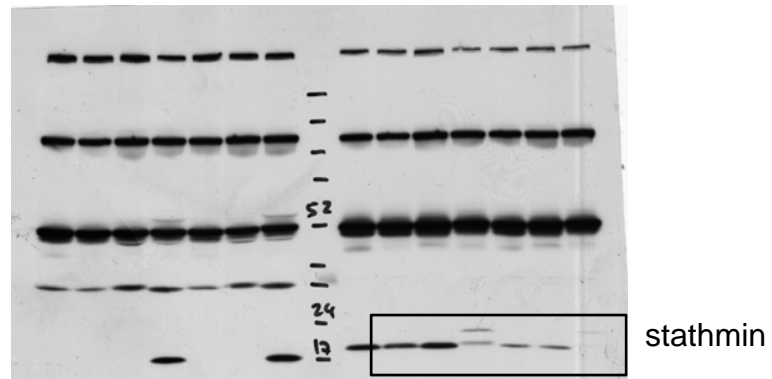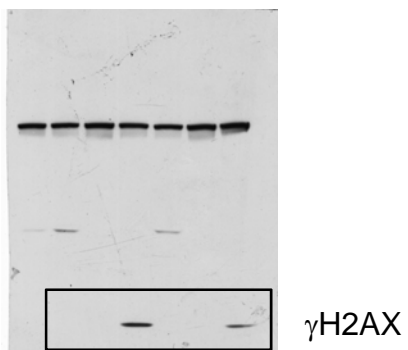

Figure 2

A

for SKOV3

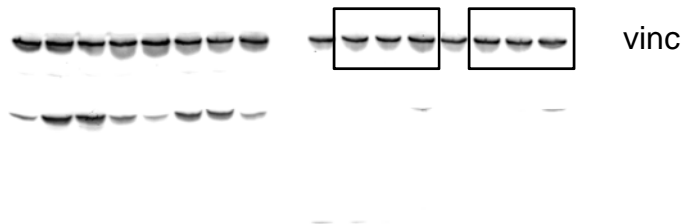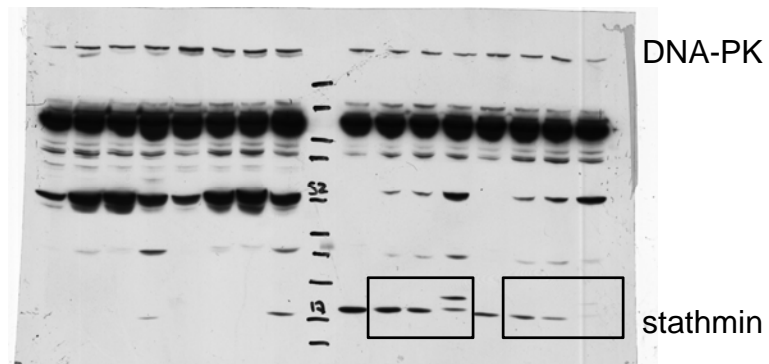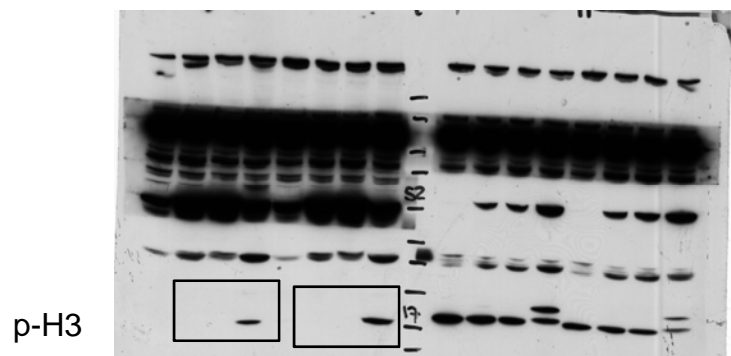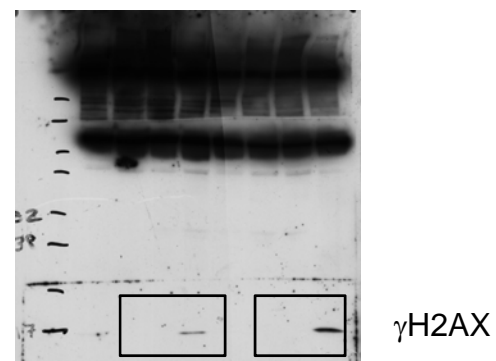

Supplement: emmm0005-0707-sd3.pdf [file emmm0005-0707-sd3.pdf]
