# Supplementary material for: Stathmin regulates mutant p53 stability and transcriptional activity in ovarian cancer
Source: PubMed Central journal article supplement (PMC3662314; doi:10.1002/emmm.201201504), 2013-04-22

Figure 3

A

for MDAH and TOV112D

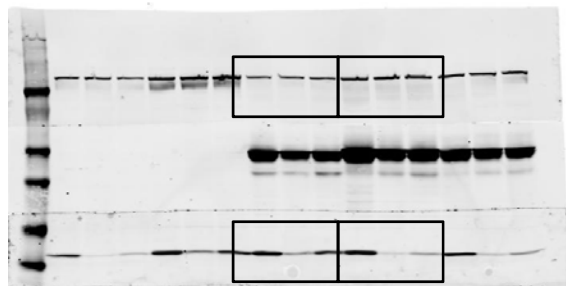

vinc

stathmin

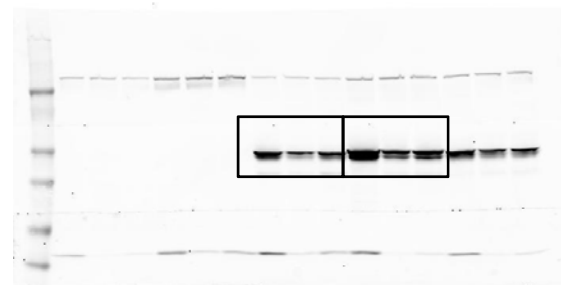

p53

Figure 3

B

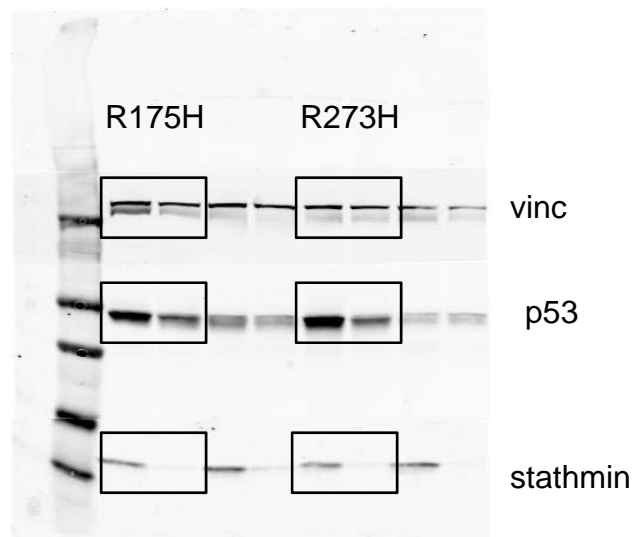

for TOV112D

C

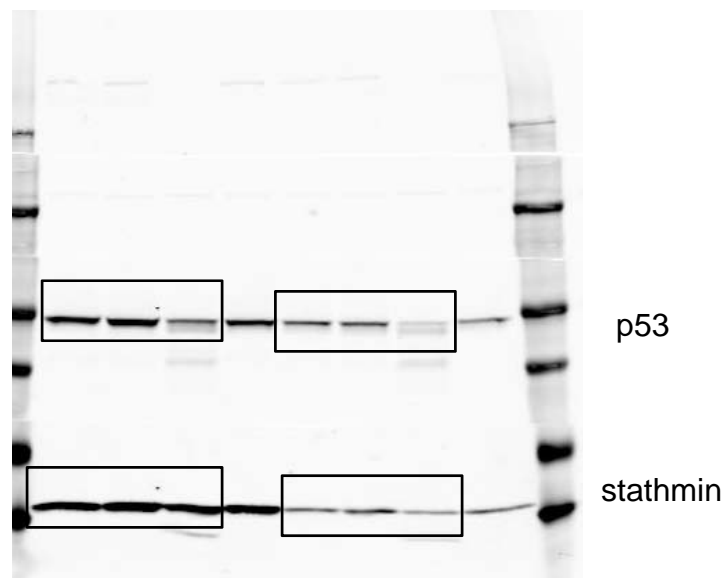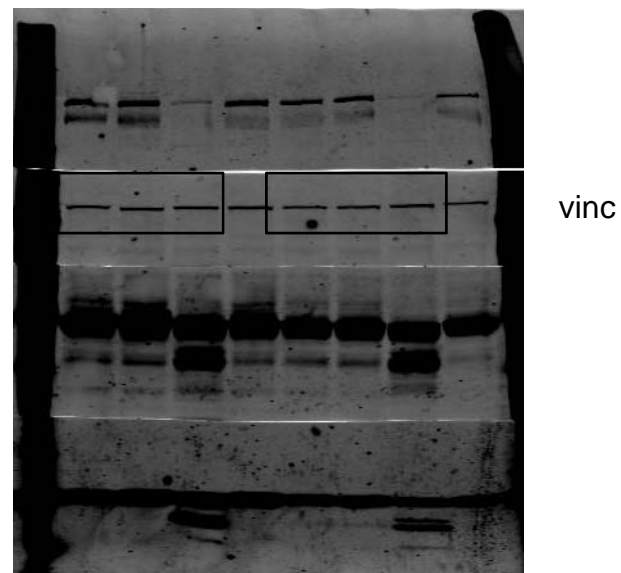

Figure 3

C

for MDAH

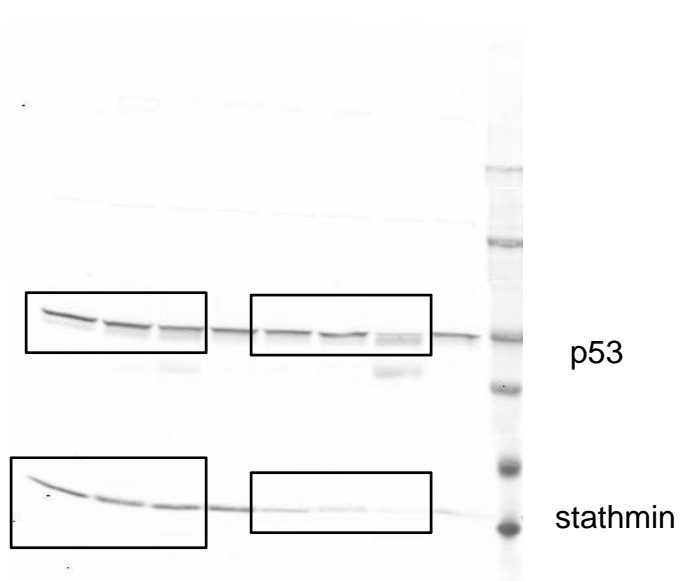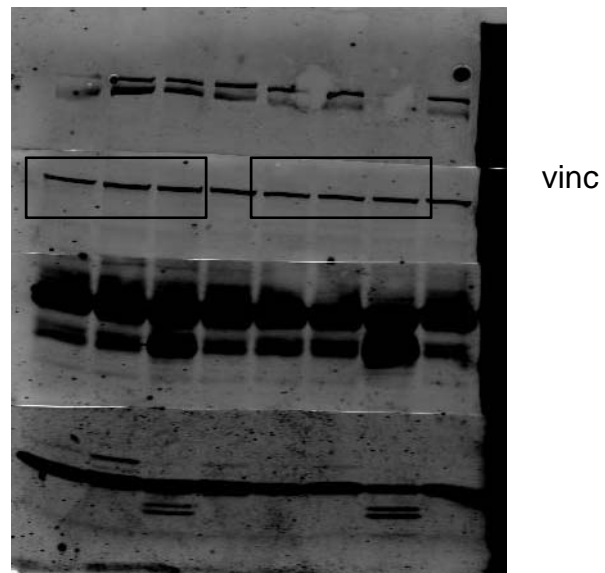

D

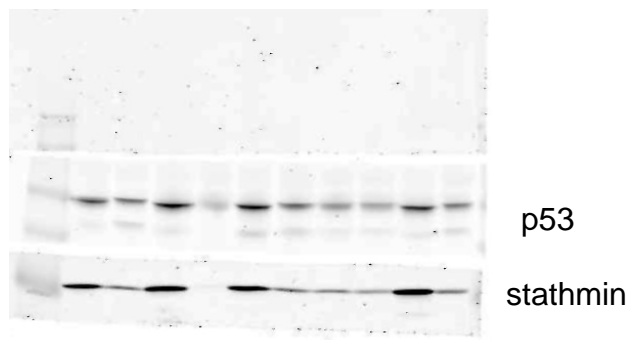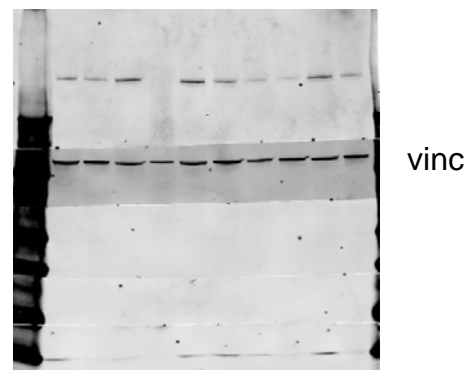

Figure 3

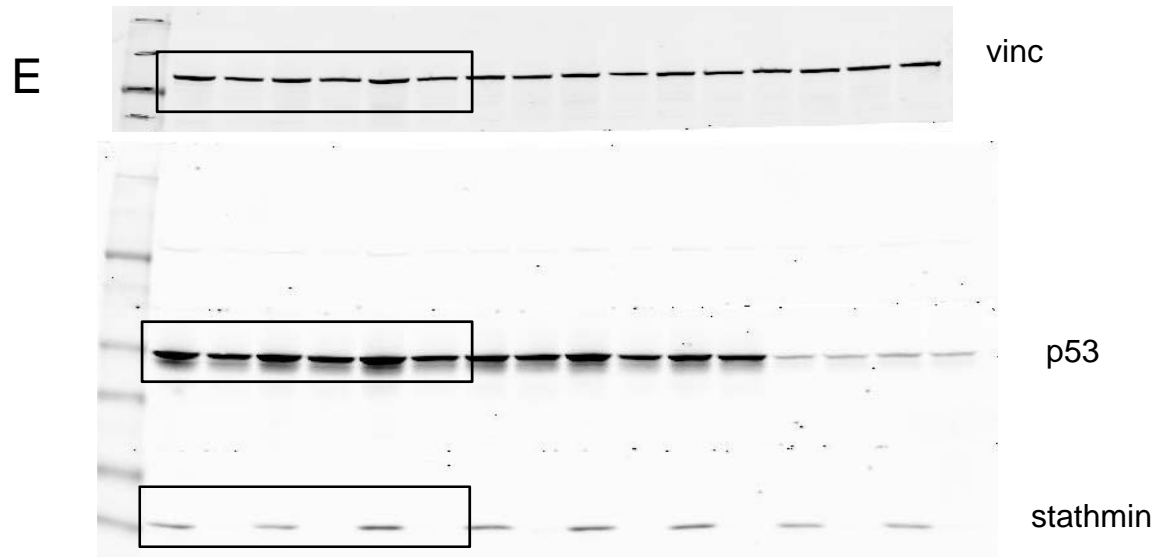

Figure 3

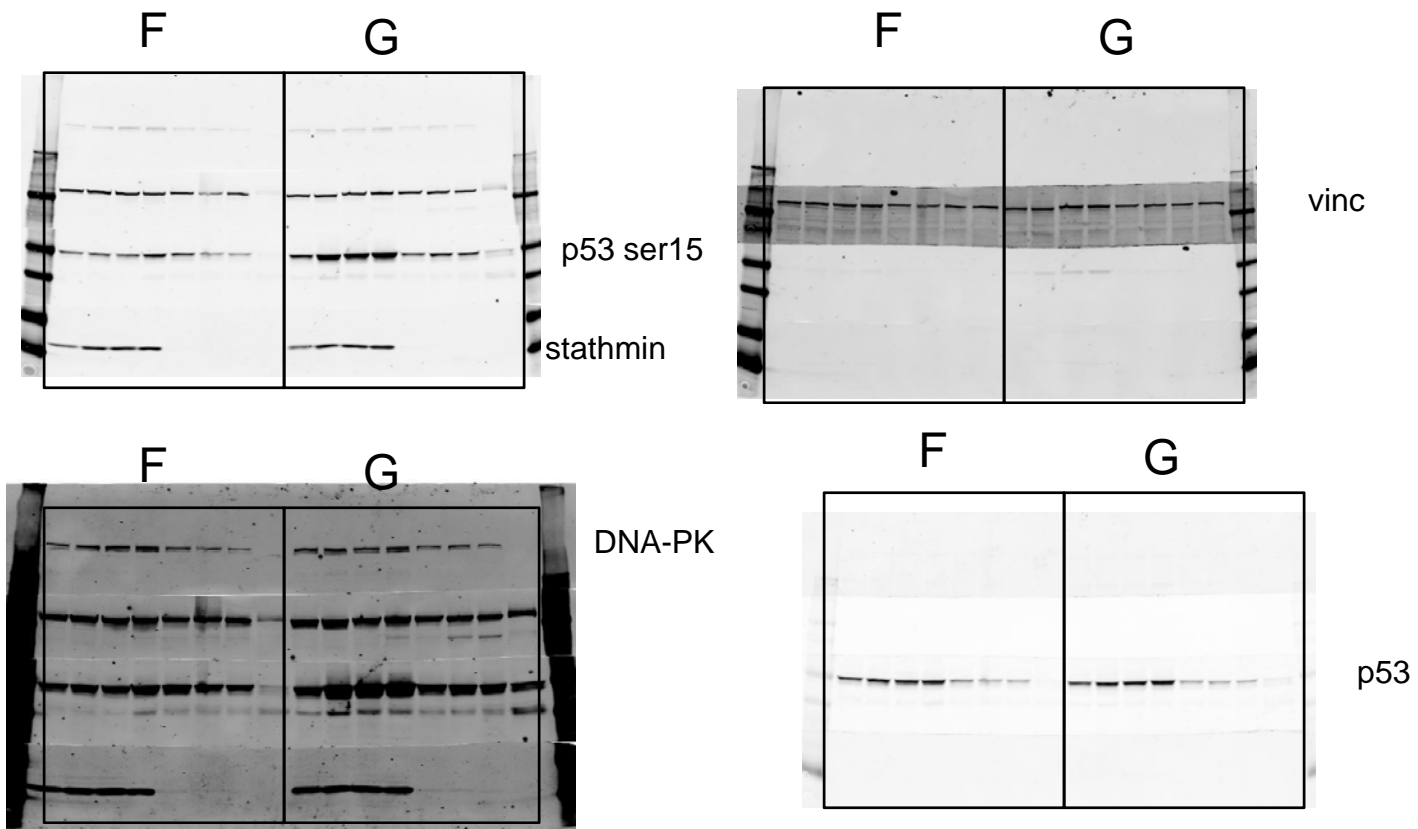

Supplement: emmm0005-0707-sd4.pdf [file emmm0005-0707-sd4.pdf]
