# Supplementary material for: Stathmin regulates mutant p53 stability and transcriptional activity in ovarian cancer
Source: PubMed Central journal article supplement (PMC3662314; doi:10.1002/emmm.201201504), 2013-04-22
Supplement: emmm0005-0707-sd6.pdf [file emmm0005-0707-sd6.pdf]

Figure 5

A

IP: p53

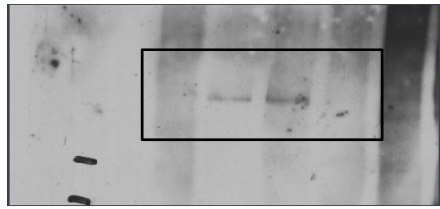

DNA-PK

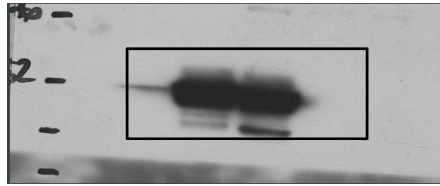

p53

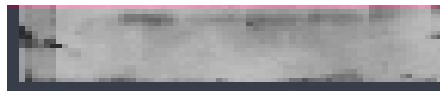

stathmin

IP: stathmin

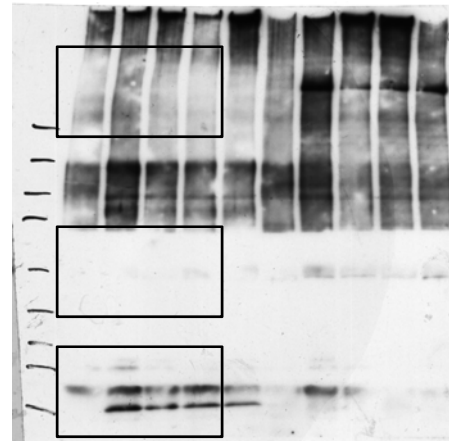

DNA-PK

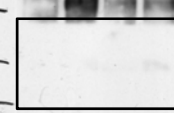

p53

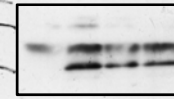

stathmin

IP: DNA-PK

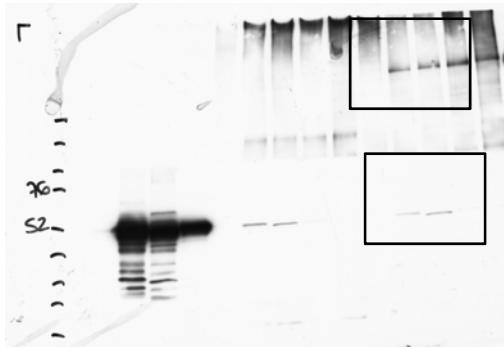

DNA-PK

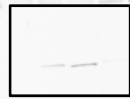

p53

Figure 5

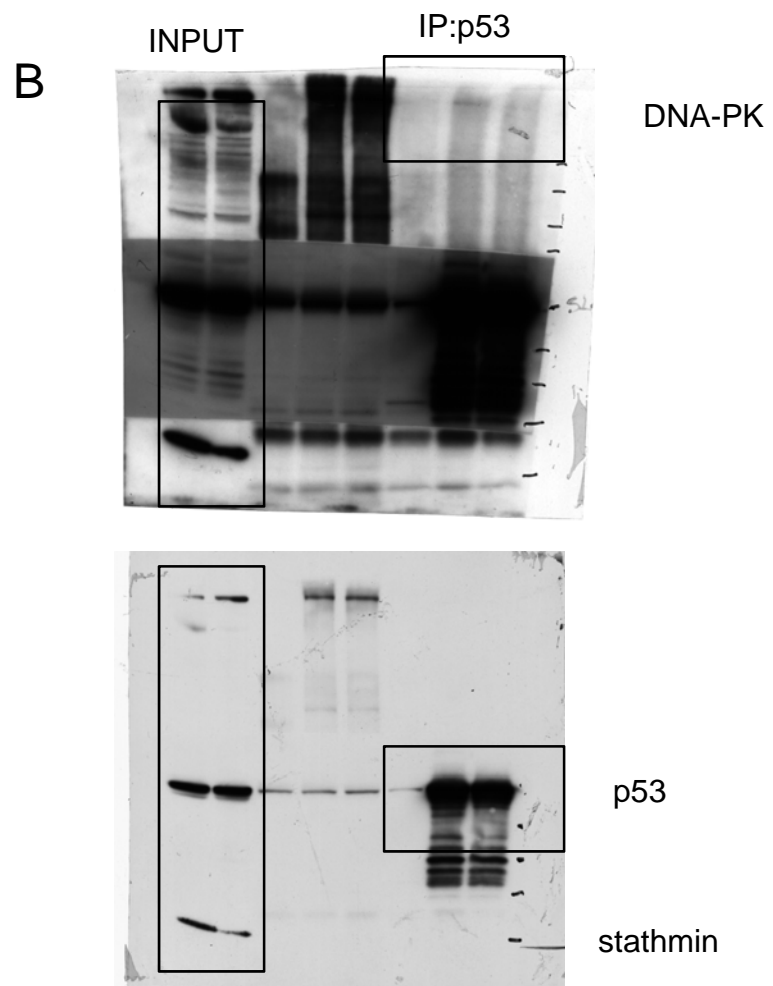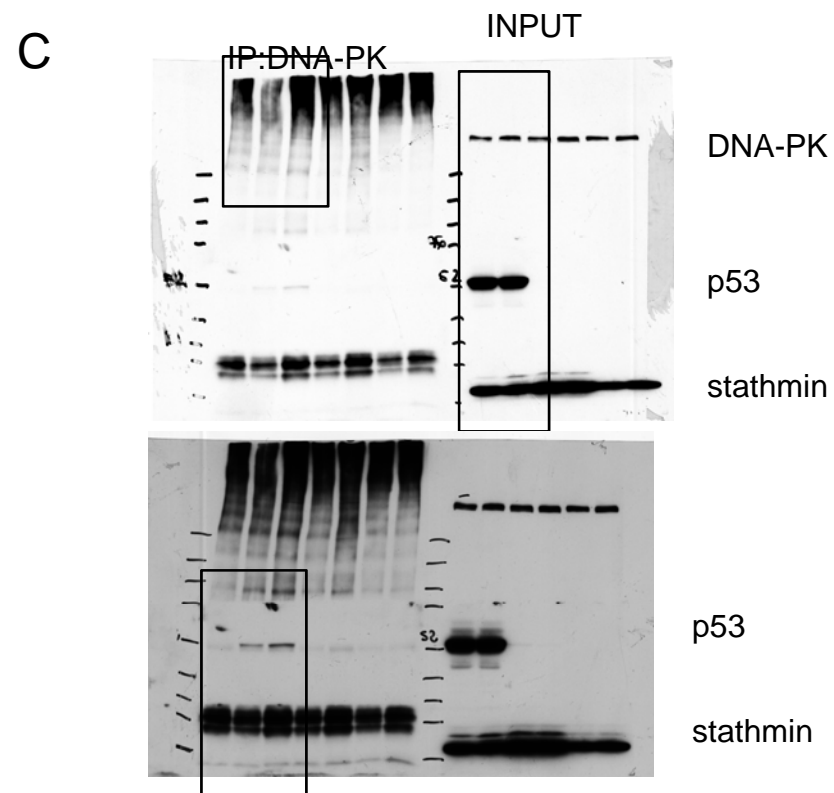

Figure 5

D

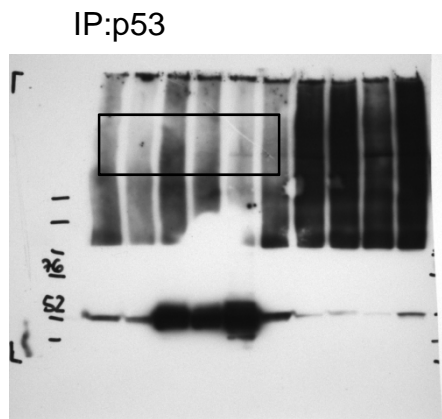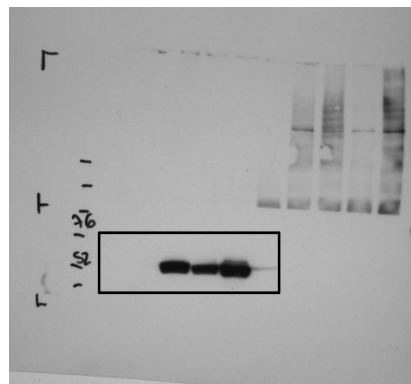

INPUT

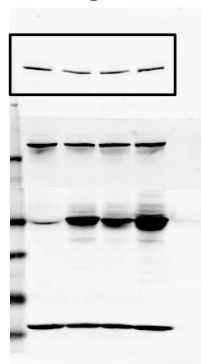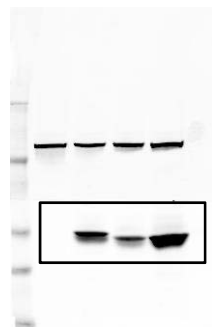

E

DNA-PK

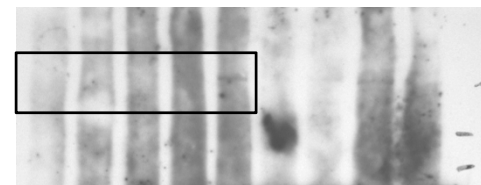

INPUT

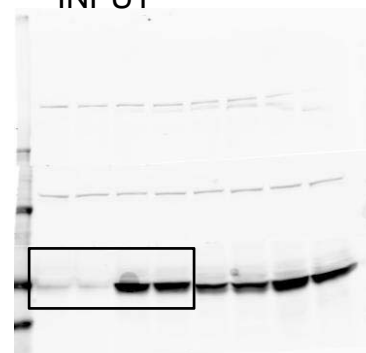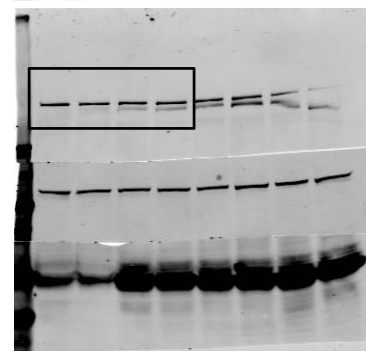

Figure 5

F

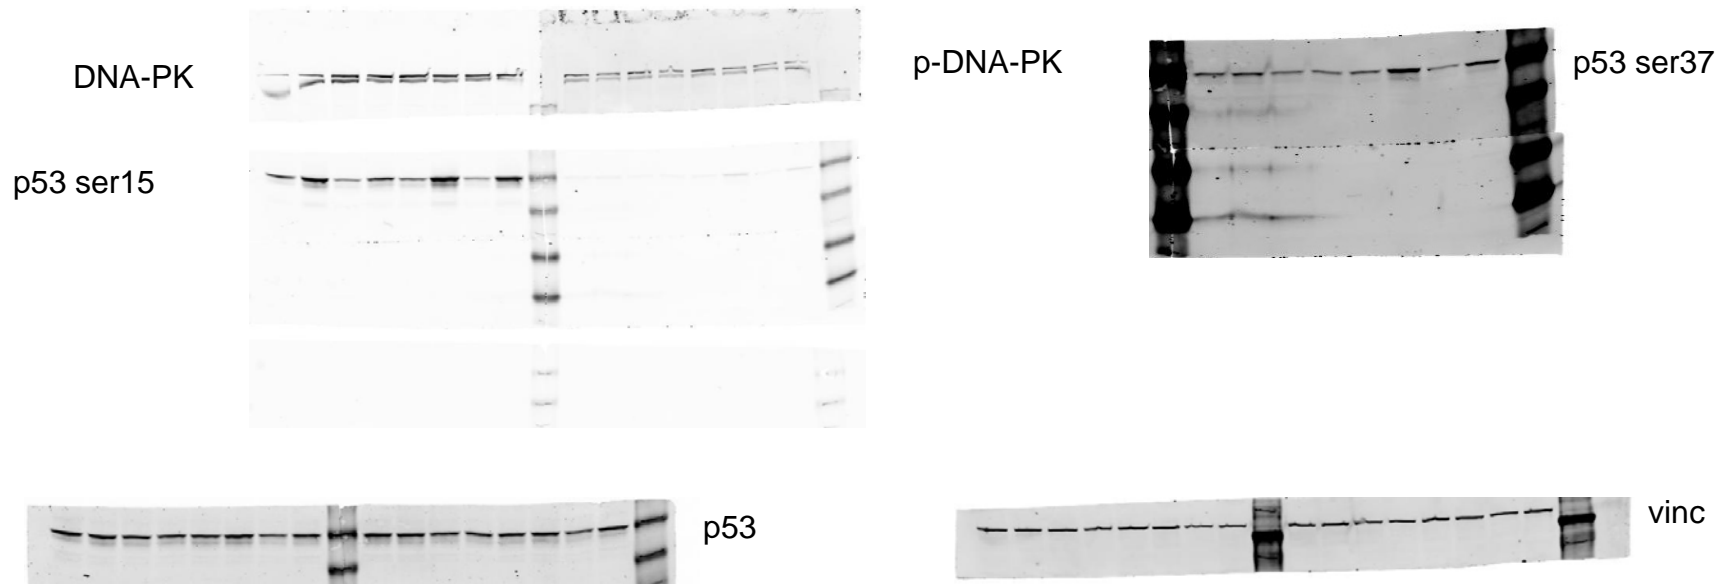

for MDAH

Figure 5

F

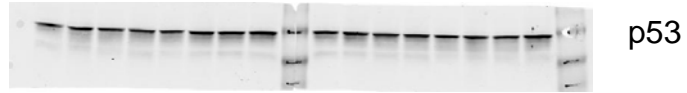

p53

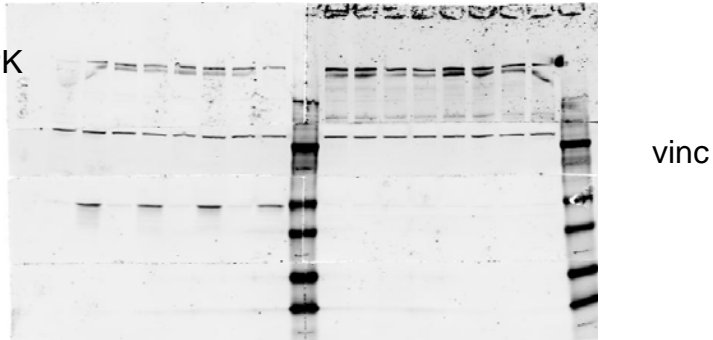

DNA-PK

vinc

p53 ser15

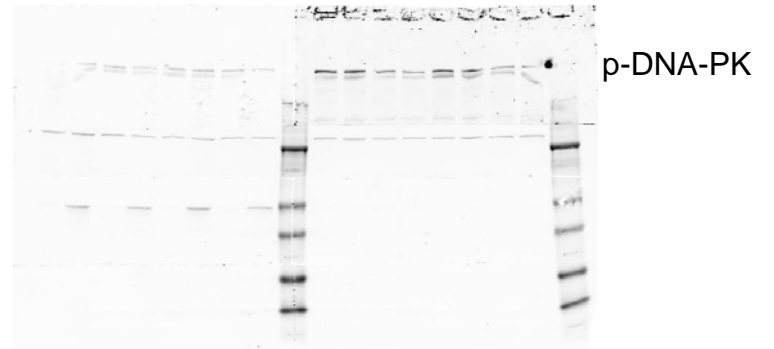

p-DNA-PK

for TOV112D
