# Supplementary material for: Stathmin regulates mutant p53 stability and transcriptional activity in ovarian cancer
Source: PubMed Central journal article supplement (PMC3662314; doi:10.1002/emmm.201201504), 2013-04-22
Supplement: emmm0005-0707-sd7.pdf [file emmm0005-0707-sd7.pdf]

Figure 6

A

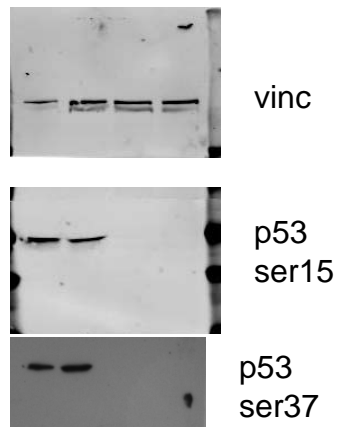

B

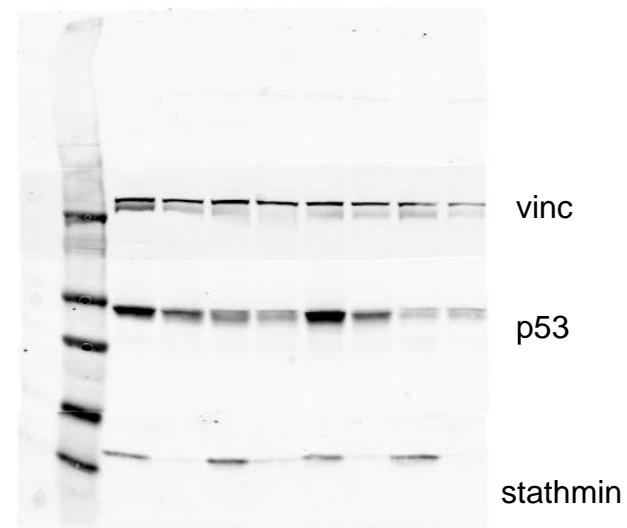

C

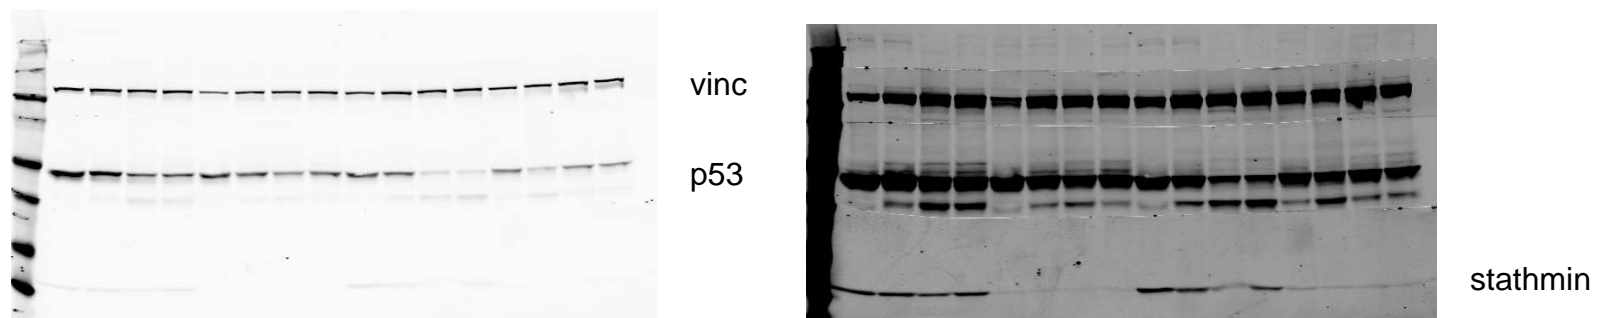

Figure 6

D

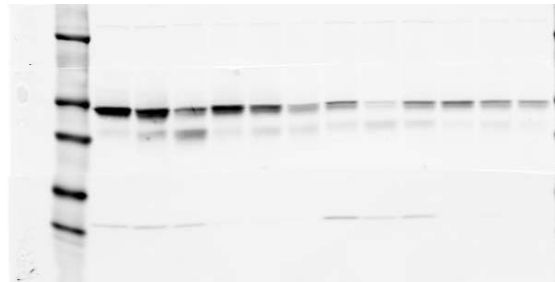

p53

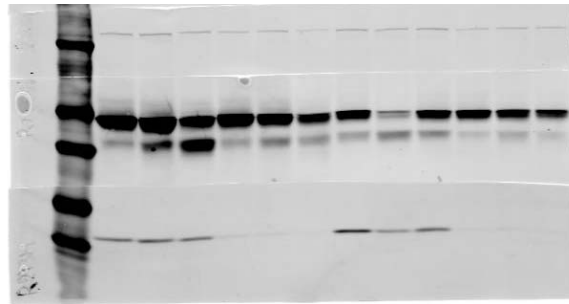

stathmin

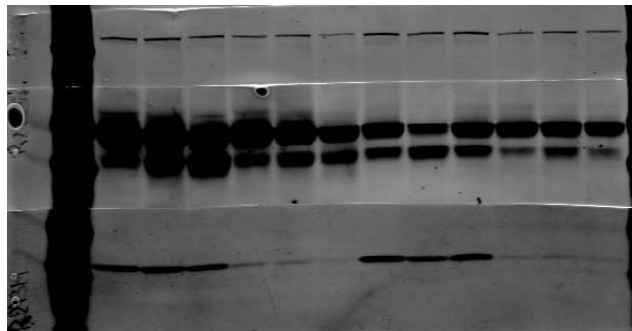

vinc
