# Supplementary material for: Stathmin regulates mutant p53 stability and transcriptional activity in ovarian cancer
Source: PubMed Central journal article supplement (PMC3662314; doi:10.1002/emmm.201201504), 2013-04-22
Supplement: emmm0005-0707-sd8.pdf [file emmm0005-0707-sd8.pdf]

Figure 7

A

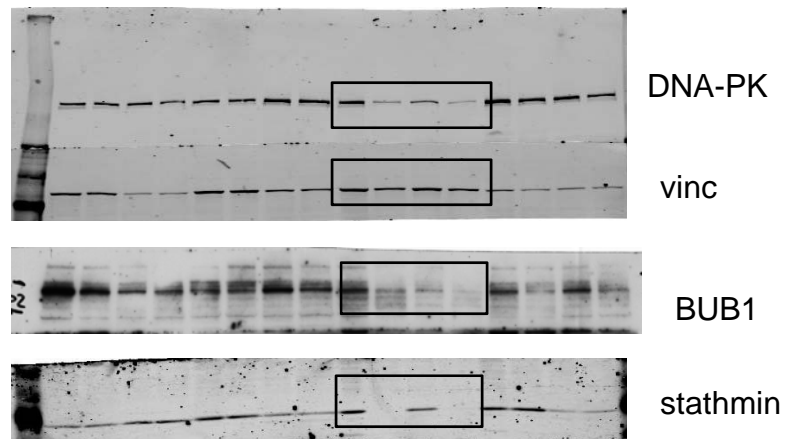

C

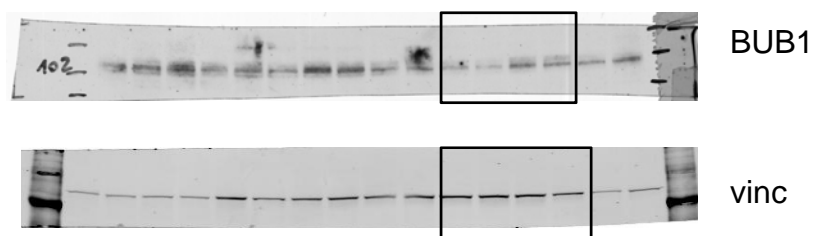

D

for MDAH

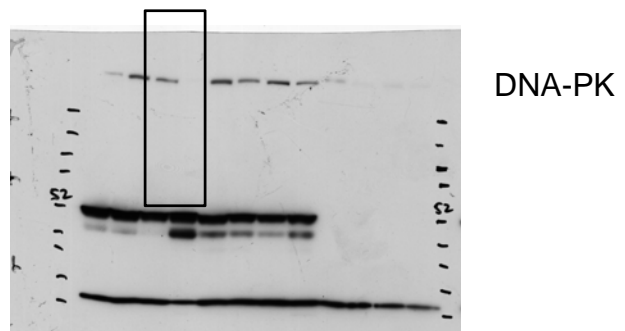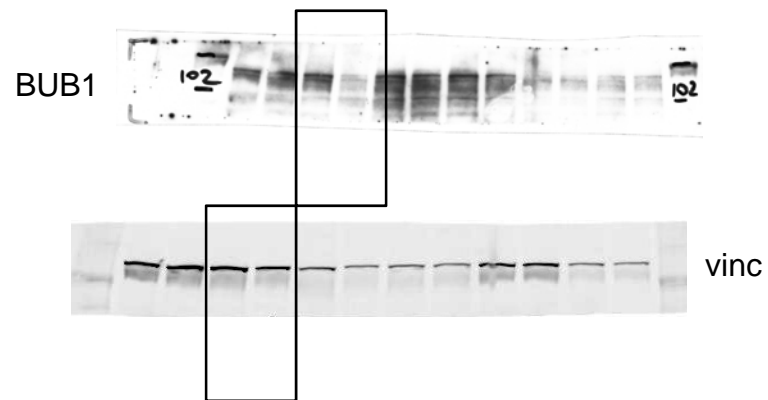

Figure 7

D

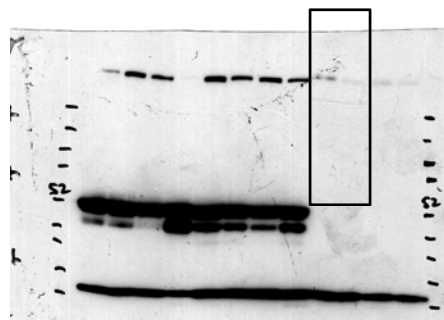

DNA-PK

for SKOV3

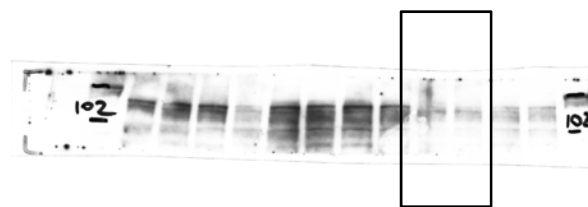

BUB1

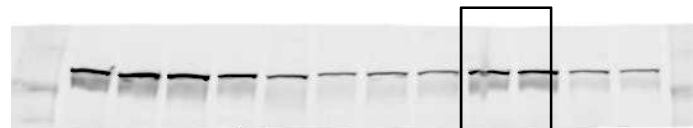

vinc

E

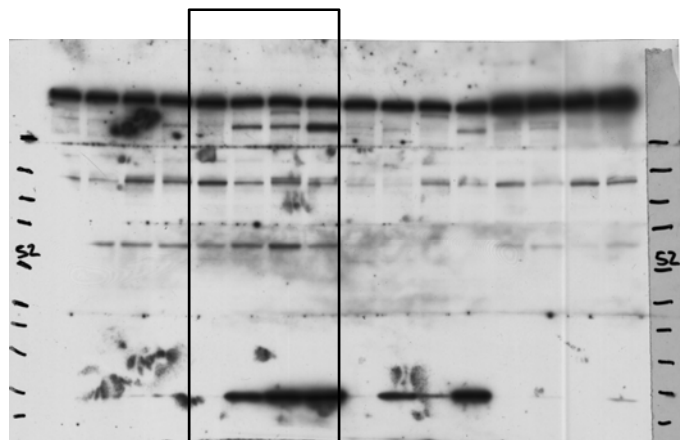

BUB1

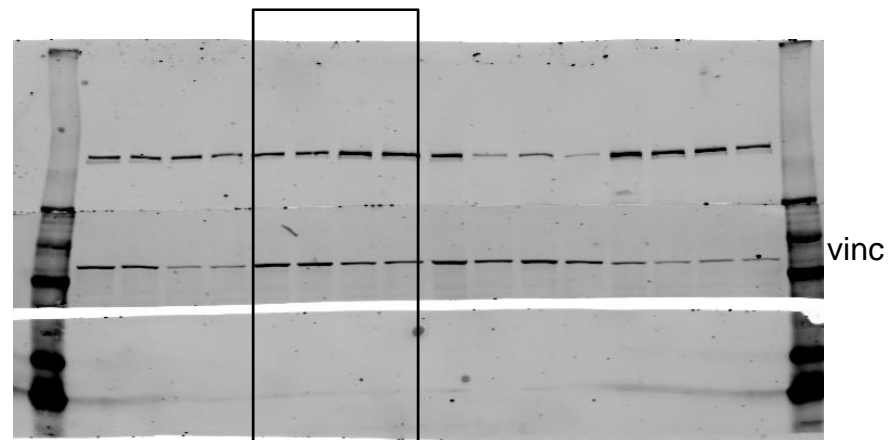

vinc
